# Supplementary material
Source: publisher figshare collection journal article supplement (https://sage.figshare.com/ndownloader/files/17534978)
Supplement: Supplementary file 1 [file 17534978]

**Supplemental Material**

**Live Cell Membranome cDNA Screen: A novel homogenous live-cell binding assay to study membrane protein-ligand interaction**.

Xun Shen1, Elizabeth Smith1, Xi Ai1, William T. McElroy5, Andy Liaw3, Tony Kreamer1, Meiping Chang6, Kristine Devito1, Edward Hudak2, Serena Xu1, Yi Pei4, Sylvie Sur4, Andrea Peier 1 and Jing Li1

1. Screening & Compound Profiling, 2 Discovery Sample Management, 3. Biometrics Research, 4. Genomics and Phenotypic Screening, 5. Chemical Biology, 6. Scientific Informatics, Merck & Co., Inc., Kenilworth, NJ, USA

Table S1. Membranome cDNA Library List
